# Supplementary material for: Estimation of environment stability for fruit yield and capsaicin content by using two models in Capsicum chinense Jacq. (Ghost Pepper) with multi-year evaluation
Source: PeerJ. 2024 Jul 10;12:e17511. doi: 10.7717/peerj.17511 (PMC11246027; doi:10.7717/peerj.17511)
Supplement: Supplemental Information 2 [file peerj-12-17511-s002.xlsx]

## Sheet: Sheet1
Plant ID	Plant height			no of main branch			leaf length(cm)			leaf breadth(cm)			days to 50% flowering			capsaicin content			fruit length			fruit diameter			fruit yield per plant			no of fruits per plant			days to maturity
	R1	R2	R3	R1	R2	R3	R1	R2	R3	R1	R2	R3	R1	R2	R3	R1	R2	R3	R1	R2	R3	R1	R2	R3	R1	R2	R3	R1	R2	R3	R1	R2	R3
1	63.3333	58.2	63.1	4.33333	5.33333	3.66667	11.6	8.36667	8.86667	7.4	4.26667	5.06667	76.6667	73.3333	80.6667	2.13367	1.996	2.09	6.76667	6	7.33333	7.5	6.83333	8.03333	404.933	344.683	516.9	57	53.6667	66.6667	178	175.667	180.333
2	57	54.2667	61.8333	5.66667	5.33333	5.33333	11.1333	8.03333	8.96667	7.03333	4.3	5.13333	72	69.3333	77.6667	1.99233	1.73433	1.75533	6.56667	6.63333	7.5	6.76667	7.03333	8.2	389.8	380.9	526.85	58.3333	55.6667	67	175	173.333	178.333
3	70.1	64.4333	67.1667	2.66667	4.33333	3.33333	10.4333	7.73333	8.56667	6.53333	4	4.7	70	68	74.3333	1.892	1.617	1.852	6.63333	6.53333	7	7.26667	7.1	7.7	302.917	304.967	367.8	43.6667	44.6667	50	174.333	171	175.333
4	58.8	55.5333	60.9333	4.66667	6	5.33333	9.86667	7.7	8.56667	6	4.03333	4.56667	73	70.3333	74.6667	1.90833	1.87367	1.96367	6.16667	6.4	7.53333	7.13333	6.9	7.93333	444.667	417.433	604.567	66.6667	62.6667	78	173	169	174.667
5	69.7667	60.4	73.2333	4.66667	5.33333	4.66667	8.96667	8.4	7.56667	5.23333	4.56667	4.3	82.3333	78.6667	82.3333	3.23467	2.62067	3.04033	7.33333	7.26667	7.8	7.7	7.53333	8.43333	588.917	503.4	693.133	78.3333	68	85.3333	175	170.667	180
6	51.8667	49.4	55.5	4.66667	4	3.33333	9.1	7.73333	8.7	5.36667	4.1	4.93333	74.3333	72	77	1.86667	1.632	1.74567	6.66667	6.33333	7.3	7.13333	6.73333	7.8	328.217	305.417	433.933	47.6667	46.6667	57.3333	176.333	173.667	178.333
7	60.3333	66.2333	61.3333	5	4.33333	5	9.53333	7.5	9.03333	5.43333	3.86667	5.3	77.6667	75.3333	80	1.53533	1.461	1.83667	6.63333	6.03333	7.13333	7.3	6.63333	7.83333	250.283	257.367	409.417	36	40.6667	54.6667	177	174.333	178.333
8	61.6667	56.7333	62.2	3.33333	4	3	10.4333	7.63333	9.3	6.46667	4	5.16667	73	69.6667	77.6667	1.70733	1.32267	1.76	8.06667	7.06667	8.26667	7.56667	6.56667	7.6	435.6	371.6	532.617	55.6667	54.6667	67	173.667	171.667	176
9	75.3333	72.5333	78.5667	4.33333	5.33333	3.33333	12.3667	8.16667	9.3	7.7	4.53333	5.3	65.6667	64.3333	69	1.97033	1.92267	1.98967	7.13333	5.96667	7.83333	7.63333	6.56667	8.33333	379.35	340.167	545.75	51.6667	54.3333	67.6667	169.667	167.667	170.667
10	68.3333	62.7667	71.2333	4.33333	5.66667	3.66667	10	9	9.13333	6.23333	5.2	5.03333	70.6667	66.6667	74.6667	1.93767	1.89467	1.91233	7.2	6.83333	7.5	7.86667	7.36667	8.13333	368.617	350.6	463.45	49	49.3333	59.3333	173.667	168.667	178.667
11	57	52.3333	59.3333	2.66667	3	3.33333	7.56667	6.9	7.63333	4.7	4.46667	5.56667	69.3333	65.3333	69	2.00233	1.968	2.041	6.4	6.03333	7.1	6.83333	6.3	7.4	262.167	215.633	330.967	39.6667	35	45.6666	169.333	167	169.667
12	62	65	68.6667	3.33333	3.33333	3	8.93333	7.4	9.13333	5.1	3.9	5.13333	69.3333	63	75	1.657	1.56733	1.57867	6.83333	6.26666	7.13333	6	5.56667	6.53333	195.55	242.75	246.4	30.6667	41	36	170.333	165.667	178
133	48.5333	52.1667	56.7667	2.66667	3.33333	2.66667	6.7	6.43333	9.03333	3.76667	3.3	5.1	74.3333	69.6667	77.3333	2.28733	2.1	2.32167	5.06667	4.96667	5.43333	4.63333	4.43333	4.86667	281.55	198.6	293.683	58	42.3333	57	171	168.333	176.333
134	48.6667	46.1333	59.1333	5.33333	3.66667	2.33333	8.33333	7.56667	8.66667	4.56667	3.9	5.26667	70.6667	65.3333	75.6667	1.516	1.346	1.62167	5.53333	5.26667	5.83333	6.26667	5.76667	5.26667	176.333	208.033	261	30	37.6667	47	173.333	166.667	178.667
15	60.4333	54.3333	63.5	5	5	3.66667	6.33333	7.76667	9.4	3.46667	4.2	22.7	73.6667	70.6667	74.6667	1.514	1.40667	1.49867	6.66667	6.03333	6.33333	6	5.43333	5.73333	395.367	308.367	377.667	62.6667	53.6667	62.6667	175	171.333	177.333
16	47.3333	49.9667	55.1	3	4	5.33333	7.43333	6.26667	8.1	4.1	3.16667	4.43333	70.3333	65	75.3333	1.303	1.311	1.36667	5.6	5.66667	6.13333	6.4	6.4	6.83333	278.033	278.85	367.5	46.6667	46.3333	56.6667	170	165.333	174
17	79.3667	68.6667	71.5667	3.66667	4.66667	3.33333	9	7.2	8.96667	5.23333	3.6	5.16667	76	71.6667	76	3.09333	2.27667	3.047	7.16667	6.6	7.1	7.83333	7.1	7.66667	346.6	338.317	435.917	46.3333	49.3333	59	177.333	172.667	178.333
18(b)	65.5667	60.2667	69.5333	5.33333	5.66667	4.66667	9.83333	8.36667	8.53333	6.03333	4.66667	4.56667	74.6667	67	70.3333	4.159	4.02067	4.201	7.13333	6.63333	7.6	7.9	7.23333	8.26667	644.933	529.067	684.867	86	76.3333	86.3333	176	170	172.667
19	68.6667	67.3333	62.6667	4.66667	3.66667	3	10.5	6.73333	7.86667	6.6	3.4	3.8	75	70.6667	74	2.81133	2.212	2.70433	7.1	6.7	7.33333	7.66667	7.1	7.83333	565.217	538.267	648.117	76.6667	78	85.3333	178.667	167.667	176.333
135(y)	65.8333	54.0667	67.4333	5	5.33333	3.66667	10.3667	9.13333	9.36667	6.36667	5.36667	5.33333	72	67.3333	75.3333	1.299	1.26433	1.55533	4.63333	4.3	5.26667	5.06667	4.73333	5.76667	431.983	364.117	496.75	89	80.6667	90	174	173.333	177.333
21	65.5667	51.1	70.8333	3.33333	4	3	9.66667	7.23333	8.5	5.76667	3.63333	4.66667	76.3333	70.3333	78.6667	2.10333	2.034	2.45367	7.2	6.66666	6.73333	6.83333	6.13333	6.23333	228.917	230.483	284.6	32.6667	36	44	174.667	172.333	178.667
22	58	57.5667	68.2667	5.33333	5.33333	4.33333	9.4	6.96667	7.33333	5.66667	3.46667	3.53333	75.6667	74.3333	77.6667	2.34667	2.25933	2.639	6.86667	6.13333	6.7	7.4	6.5	7.2	227.617	270.65	325.183	32	42.6667	47	176.667	175.333	179
136	62.9333	53.6667	59.1667	2.66667	3.33333	3	8.36667	6.56667	7.1	4.46667	3.2	3.23333	71.3333	69	74.3333	2.11867	1.82333	2.02367	6.26667	6	6.83333	5.66667	5.6	6.33333	224.433	238.417	312.5	37.3333	41	47.3333	169.333	166.333	173
24	60.8333	55	62.9667	2.66667	3	2.66667	8.66667	7.3	7.1	4.83333	3.66667	3.36667	77	73.6667	77.6667	3.04633	2.231	2.64433	5.6	5.46667	6.5	6.33333	6.13333	7.13333	206.117	285.633	345.45	34.6667	49.3333	50.6667	178.333	176	178.667
25(y)	58.2667	49.6333	65.4	4.33333	5	3.33333	11	7.83333	8.96667	7	4.2	5.33333	73.6667	65	75	1.42333	1.28267	1.67333	7.3	6.86667	7.2	7.86667	7.4	7.8	401.117	200.633	354.017	53	28.3333	47.3333	170.333	165.333	176.667
26	76.1	63.5667	70.9667	3	5.33333	3.33333	10.8333	8.23333	8.23333	6.93333	4.46667	4.5	74.6667	65.6667	71.3333	2.064	2.16233	2.58233	6.9	6.1	7.6	6.4	5.43333	7	511.95	374.15	554.95	77	65	76	176	169.333	173
27	76.7333	70.8667	76.2667	2.33333	4	3.33333	9.26667	7.13333	7.66667	5.43333	3.56667	3.96667	70	63	67.3333	2.027	1.92933	2.17633	7.26667	6.4	6.96667	7.96667	7.1	7.46667	486.7	340.917	503.2	64	50.6667	69.6667	170.333	165.333	170
28	59	63	64.4333	5.33333	4.33333	4	10.1667	6.8	7.26667	6.23333	3.4	3.56667	70.3333	67.6667	73	1.827	1.38967	1.92733	7.7	7.4	8.23333	7.2	6.76667	7.63333	572.2	507.933	674.233	76.6667	71.6667	85	168	166.333	171
29	65.9667	52.6667	67.3	4.66667	5.66667	4.33333	9.83333	8.6	9.53333	5.96667	4.83333	5.63333	74.3333	73.3333	76.6667	2.10667	1.91333	2.00367	5.46667	5.96667	5.86667	4.9	5.33333	5.23333	326.1	273.683	327.667	62.6667	48.3333	59.3333	173	169.667	174
30	48	52.1	52.9667	4.66667	3	4	5.93333	5.23333	6.23333	2.9	5.46667	3.1	67.6667	64.3333	72.6667	1.45867	1.35567	1.63767	5.63333	5.03333	5.73333	5.06667	4.66667	5.16667	499.083	422.9	509.467	93.3333	87.3333	93.3333	170.333	166.667	173.667
31	45.8333	54.2667	62.4333	5	4.33333	4	8.5	7.03333	8.03333	4.7	3.53333	4.23333	66.3333	63	70	1.72233	1.53933	1.76067	7.93333	7.3	7.8	7.13333	6.66667	7	276.583	157.05	292.867	36.6667	22.3333	39.3333	168.667	166.333	171.333
32	62.6667	57.2667	58.9	3.66667	4.66667	4.33333	8.73333	7.93333	8.4	4.83333	4.13333	4.73333	70.6667	63.3333	69.6667	2.13867	1.94367	2.11433	6.33333	5.8	6.2	7.03333	25.2	6.8	276.5	432.4	285.7	41.3333	37.3333	44	170	165.333	172.333
33	48.1	53.1667	54.5333	5.33333	5	5	8.93333	7	7.46667	5.1	3.43333	4.13333	65.3333	63	70	1.63367	1.70533	1.71733	6.13333	6.13333	6.36667	6.9	6.5	6.83333	330.917	227.617	412.233	50.6667	49.3333	62.3333	166.667	165.667	172.333
34	59.6667	48.6667	64.8667	6	6	5.33333	9.66667	6.96667	8	5.8	3.4	4.4	78.3333	73.6667	78.6667	2.13967	1.93	2.137	8.03333	8.23333	8.73333	8.43333	8.6	9.16667	521.4	463.517	597.1	63.3333	55	66.6667	179.667	173	180
137	51	60.1333	53.1333	4	3.33333	3.66667	9.36667	6.96667	8.63333	4.56667	3.4	4.9	65.6667	62.6667	69.3333	1.46533	1.56467	1.77867	7.4	7.16667	7.7	6.73333	6.46667	7.06667	260.933	149.767	326.917	37	22	44.3333	169	165.333	171.333
36	53.0667	41	59.4333	2.66667	5.66667	3.33333	8.03333	6.83333	8.1	4.36667	3.43333	3.86667	79.6667	78	80.3333	2.11367	2.10233	2.44133	5.16667	5	5.16667	5.66667	5.4	5.63333	276.483	233.867	253.783	51	45	47	180.333	176.333	182
138	63	53.1667	55.8333	4.33333	5.33333	4	6.5	7.13333	8.13333	3.73333	3.56667	4.4	79	76.3333	78.6667	2.26	2.33067	2.595	6.73333	6.33333	6.93333	7.36667	6.8	7.43333	345.117	156.783	353.667	49	24	49.3333	178.667	175	180.667
38	65	58.3667	55.5333	3.33333	4	4.66667	9.56667	9.06667	9.43333	5.76667	5.33333	5.76667	79	75.6667	78.3333	1.936	1.573	2.03433	6	5.3	6.03333	6.46667	5.83333	6.5	652.633	390.333	612.483	104.667	70	97.6667	179.333	177	180
39	65.1	60	65.0333	2.66667	3.66667	3.33333	5.56667	5.2	5.86667	2.73333	2.5	2.9	82.3333	76	79.6667	2.252	2.12433	2.38233	5.83333	4.86667	5.93333	5.03333	4.4	5.43333	576.267	378.567	537.633	106	81.6667	94.6667	171	164.333	177.667
40	59.1333	44.2	62.9	2	4	2.33333	8.7	6.93333	8.5	4.9	3.5	4.8	75	70	73	2.11567	2.02233	2.54333	5.83333	5.43333	6.43333	6.36667	6.03333	6.86667	349.65	125.1	371	57.3333	50	55.6667	176	168.333	174.667
41	57	50.9	54.8	2.66667	4	3.33333	9.23333	7.43333	7.43333	5.36667	3.83333	4	71	69	73.6667	2.02533	1.861	2.02067	6.06667	5.4	6.43333	6.7	5.86667	6.8	267.2	152.067	310.45	42	27	47	172.333	168	176
42	62.4667	48.5667	68.0667	5	4.33333	3	10.3667	7.3	8.66667	6.5	3.63333	4.8	82	77.3333	80	3.212	2.67567	2.97933	7.43333	6.33333	7.53333	7.9	6.86667	7.93333	289.133	177.683	366.083	37.6667	27	47.3333	180	171	178.333
43	59.7667	60.5333	65.6	3.66667	3	3.33333	9.8	7.73333	8.16667	5.96667	4.03333	4.6	75	72.6667	76	2.173	2.08433	2.11833	6.53333	6.13333	7.06667	7.1	6.5	7.43333	297.383	197.717	369.8	43.6667	31.3333	51	175.333	173	178.667
44	61.3333	57.7667	69.3	3.33333	3.33333	2.66667	10.1333	6.33333	7.33333	6.3	3.1	4.03333	68.3333	64.3333	70.6667	1.77433	1.79	1.76333	8.26667	7.33333	8.2	7.8	6.93333	7.66667	422.55	265.833	377.833	43.6667	31.3333	51	165.667	161.333	172.333
45	57	60.3333	65.7667	4	3.33333	3.66667	6.46667	5.16667	6.1	3.43333	2.53333	3.53333	67.6667	62.6667	70.6667	2.648	2.382	2.88567	5.3	4.23333	5.8	4.56667	3.46667	5.13333	669.483	347.567	580.867	135.667	90	106	167.333	164.667	172
139	58.6333	49.6667	64.5667	5	6	3.33333	10.8333	9.1	8.66667	6.9	5.26667	4.73333	71	67	73.6667	2.06367	1.81267	2.10967	6.7	5.83333	6.76667	7.1	6.13333	7.13333	390.867	319.7	369.433	56.3333	53.3333	53	169	165.667	173
47	40.6667	50.0333	59.3333	5.33333	5	3.66667	6.9	7.9	8.66667	3.53333	4.13333	4.7	71.3333	69.3333	74	2.01933	1.87867	2.24833	5.36667	4.86667	6	5.73333	5.23333	6.3	122.4	186.9	260.667	22	37	42.3333	173.333	170.667	176.333
48	61.8333	58.9333	67.4	5.33333	5.33333	5	10.1	9.06667	12	5.6	5.23333	7.56667	69.6667	64.3333	72.3333	2.34133	1.762	1.929	6.7	5.76667	7.23333	7.3	6.06667	7.56667	477.05	297.517	512.617	68	50.3333	69.3333	168.667	166.333	173.667
49	66.4667	63.7333	70.6333	4	5.33333	3.33333	10.0333	6.36667	8.26667	5.8	3.13333	4.56667	67.6667	62.6667	69.6667	1.386	1.51533	1.69967	6.96667	6.5	7.83333	7.4	6.76667	8.3	409.9	320.183	420.6	57	48.3333	52	169.333	164.667	171.333
50	65.4333	53.3333	65.7667	4.66667	3	3	9.2	7.66667	7.96667	5	3.9	4.2	70.3333	65.6667	73.6667	1.96567	1.80833	2.08333	6	5.63333	6.16667	6.53333	6.03333	6.6	216.633	227.4	294.783	34.6667	39	46.3333	173.667	168	177.667
140	58.1667	42.3333	64.1	4	5.33333	4.33333	10.5667	8.9	8.66667	6.56667	5.13333	4.96667	65	62.3333	69	1.394	1.38733	1.648	6.26667	5.93333	6.93333	6.8	6.23333	7.3	226.3	288.3	382.45	34.3333	47.3333	53.6667	168.667	165	174.333
141	54.6	58	66.6667	4.66667	3.33333	3	10.5	8.73333	10.5333	6.56667	5.03333	6.56667	68.6667	64.3333	74.6667	1.84133	1.56433	1.70867	7.46667	6.9	7.9	7.93333	7.2	8.26667	260.433	297.983	273.15	33.6667	42.3333	33.6667	167.667	164.333	171.667
53	50.6667	50.9333	63.5	4.66667	3.66667	3	9.4	7.76667	7.36667	5.5	4.2	3.93333	74.6667	71.6667	75.6667	2.211	1.912	2.434	7.53333	6.96667	8.33333	8	7.3	8.66667	299.317	340.25	422.083	38.6667	47.6667	49.6667	176.333	170.667	179
54	51	60.9333	63.8667	4.66667	3.33333	3.66667	9.4	9.3	9.53333	5.6	5.5	5.7	76	69.6667	73	2.37033	2.376	2.66867	7.13333	6.1	6.6	7.63333	6.63333	6.9	613.167	399.583	520.85	83	62.6667	77	175.333	170	170.333
55	62.2667	58.6	69.1667	4.33333	3.66667	4	10.9667	8.5	8.53333	6.93333	4.76667	4.73333	67.6667	63	74.6667	2.027	1.82	1.979	6.73333	5.86667	6.83333	7.56667	6.46667	7.23333	347.2	381.383	475.5	48.6667	61.6667	67.6667	166	162.667	174
56	52.8667	59.6667	62.6667	5.33333	4	3.33333	9.63333	8.1	8.8	5.76667	4.33333	4.9	67.6667	62	71.6667	1.49333	1.31267	1.49367	4.83333	4.33333	5.5	5.33333	4.73333	5.8	412.583	371.317	531.7	81.3333	82	94	167.333	164	170
57	41.3333	59.1333	66.8	5	4.33333	3.66667	7.6	7.13333	7.16667	4.1	3.43333	3.86667	71.3333	68	73.6667	2.30367	2.02333	2.043	5.56667	4.76667	6.23333	6.1	5.16667	6.53333	365.7	291.033	420.117	62.6667	58.6667	65.6667	172.333	169.667	175.333
58(r)	60	37.91	72.8667	4.33333	5	4.33333	11.0667	10.4333	9.86667	7	6.2	6.1	73.3333	66.3333	72.3333	2.65433	2.047	2.07867	6.53333	5.86667	6.23333	7.13333	6.46667	6.83333	655.4	511.05	705.3	96	82.6667	108	171	166	173.333
59	52.5333	43.3333	57.9333	4.33333	5.33333	4	9.23333	9.03333	9.23333	5.4	5.3	5.46667	81.3333	74	77.6667	2.45	2.01367	2.45	6.1	5.7	6.4	6.46667	6.1	6.73333	349.883	365.95	506.45	55.6667	62	77	172.333	166.333	169.667
60	71.6667	61.0667	68.6	3.66667	5.66667	4.66667	12.4333	8.53333	10.5333	6.6	4.63333	6.43333	81.3333	66.6667	77.6667	3.98567	3.88867	4.06267	6.6	6.03333	7.2	7.46667	6.83333	8.1	634.4	497.733	760.383	90.3333	77.3333	99.3333	177.667	170.333	176.667
61	50.6667	60.4333	57.2333	5	3.33333	5.33333	8	7.5	8.03333	4.36667	3.76667	4.46667	79.6667	76.3333	82	2.16867	2.037	2.081	5.76667	5.4	5.7	5.03333	4.7	5.06667	135.8	195.233	234.85	25.3333	38.6667	43.6667	173.333	174.667	176
62	65.9	53	61.5667	5	3	3.66667	8.53333	7.13333	7.8	4.83333	3.33333	4.36667	70.3333	65.3333	75	1.904	1.71167	2.02833	6.46667	6.23333	6.7	5.83333	5.6	6	343.917	343.767	405.467	55.3333	58	64	172	167.333	176.667
63	53.3333	61.1667	66.4	5.33333	4.66667	4.33333	5.9	5.76667	6.23333	3.33333	2.8	3.6	69	63	73.3333	2.28533	2.14667	2.419	4.93333	3.96667	5.13333	4.4	3.6	4.6	434.367	321.433	461.983	93.3333	84.6667	95.3333	168.333	165.333	174.333
64	53	58.9667	70.7333	3.33333	2.66667	3	6.23333	5.76667	6.16667	3.1	2.86667	3.33333	69.6667	63.6667	74	2.02467	1.97367	2.19133	4.9	3.9	4.96667	4.23333	3.53333	4.5	448.2	284.167	442.783	98	76.3333	93.6667	169	166.667	175
132	61.3333	68.7667	66.7333	4.33333	3	3	10.4	9.23333	9.5	6.53333	5.53333	5.53333	83.3333	75.3333	81.3333	2.533	2.01233	2.67667	6.83333	5.36667	7.36667	7.5	5.8	8.03333	690.95	447.117	878.25	96.3333	80	114	174.333	170.333	177.333
66	65.3	68	70.7	3.66667	4.66667	4	10.8667	9.2	9.73333	7.03333	5.53333	5.8	87.3333	80.6667	83.3333	2.71133	2.11367	2.79867	6.63333	6.56667	7.06667	7.3	7.1	7.63333	682	579.467	751.567	97.6667	84.6667	102.333	179	172.667	174.667
67	39.6667	51.1667	63.9667	4.66667	3.66667	4.33333	8.06667	6.93333	7.96667	4.43333	3.26667	4.33333	70	63.6667	77	1.707	1.42733	1.99667	5.2	4.46667	5.86667	5.63333	4.83333	6.3	257.1	244.55	353.733	47.3333	52.6667	58	168.667	164.667	175
68	62.8	59.7667	64.8333	3	5	4	10.7	8.93333	8.86667	6.8	5.26667	5	77.6667	76	81.6667	2.79133	2.479	2.52167	7.16667	6	6.66667	7.6	6.4	7.13333	615.517	451	616.067	83.3333	72.6667	89.3333	175.667	171.667	180
142	71.9	60	72.5	3.33333	4	3.66667	11.6	9.83333	9.53333	7.3	6.06667	5.3	68.6667	62	72.3333	1.478	1.51467	1.80767	6.66667	6.1	6.73333	7.03333	6.4	7.16667	338.967	296.333	426.933	49.6667	47.3333	61.3333	161.667	159.667	164.333
70	69.8333	67.4	76.0333	4.33333	5.33333	4	10.7	9.8	10.6667	6.83333	6.03333	6.63333	95.3333	85.6667	90.3333	3.20333	3.09833	3.3022	7.767	7.533	7.9	8.5	8.2	8.667	805.42	707.9	806.18	99	90	97.33	184.333	176.667	180
71	62.2	50.2667	59.1	4.66667	2.66667	3.33333	9.53333	7.26667	8.43333	5.73333	3.56667	4.7	69	63.3333	71.3333	1.85367	1.63367	1.701	5	4.73333	5.8	5.36667	5.06667	6.13333	140.583	179.25	252.833	27.3333	36.6667	42.3333	165.667	159.667	170
72	58.6667	65.7333	69.8667	5.33333	4.33333	3.33333	10.4	7.36667	8.66667	6.56667	3.53333	4.8	77.6667	71.3333	75	2.95033	2.41	3.027	7.66667	6.73333	7.7	7.2	6.26667	7.1	335.167	280.75	327.467	45	43.3333	44	166.333	161.667	164.667
73	39	40.7333	48.6	4.66667	4.33333	4.33333	9.73333	6.83333	7.23333	4.9	3.1	4.1	67	59	71.3333	1.897	1.856	1.96	5.66667	5.4	5.86667	6.16667	5.8	6.43333	223.95	231.467	283.233	37.6667	41.3333	46	157.667	151	162.333
74	61.7	57.2667	63.6333	4.33333	5.33333	3.66667	9.36667	8.46667	7.23333	4.63333	4.83333	4.13333	78	70.3333	73.6667	1.91	1.884	2.136	5.73333	5.3	5.93333	6.23333	5.63333	6.33333	462.417	376.867	498.367	77	69	81.3333	168.667	162	166
75	47.0667	52.8667	59.6	3.66667	3.33333	4	6.6	7.76667	7.53333	3.9	4.06667	4	76	73.3333	78.6667	2.10567	1.94533	2.22767	4.8	4.26667	5.23333	5.3	4.63333	5.6	186.85	163.733	259.667	36.6667	37	48	168.667	166.667	174.667
76	51.2667	49.0333	55.2667	3.33333	3	3	9.36667	8.1	8.6	5.3	4.4	4.8	75.3333	72.3333	79.3333	1.99667	1.975	2.112	5.03333	4.43333	5.66667	5.8	5.13333	6.43333	229.733	227.417	323.783	42.6667	47.6667	53.3333	169.667	161.667	177
77	57.9667	61.0333	61.9	3.66667	3.33333	4	10.7	9	9.2	6.76667	5.2	5.46667	68.6667	64	70	1.75167	1.33933	1.73367	4.93333	4.36667	5.26667	5.36667	4.73333	5.8	442.017	299.133	454.25	85.6667	65.6667	82.3333	166.333	163	170.667
78	57.3333	49.7667	60.4667	4.66667	4	4.66667	12.2667	9.26667	10.2667	7.66667	5.56667	6.36667	66.3333	61.6667	67.3333	1.415	1.529	1.722	5.43333	4.73333	5.66667	5.86667	5.13333	6.06667	262.9	222.3	332.833	46.6667	45	56.6667	164.333	157	168.333
79	43.3333	47.6	50.9	4.33333	4	4	7.33333	6.8	8.26667	4.13333	3.16667	4.36667	69.3333	61.6667	65	1.53067	1.26667	1.70533	5.83333	5.26667	6.26667	6.3	5.56667	6.86667	602.3	340.283	684.45	99	62.6667	104.333	162.333	156	159.333
80	50.6667	60.2667	64.6667	3	2.66667	3.33333	10.7333	7.86667	9.26667	6.46667	4.1	5.33333	69.3333	65.3333	71.3333	1.40233	1.401	1.75067	7.16667	6.13333	6.83333	7.63333	6.63333	7.33333	718.35	436.217	698.017	97	68.3333	98.3333	165.333	160	170.333
81	47.5333	47.1	65.0333	5.66667	4.66667	3.66667	8.7	7.56667	8.73333	5.03333	3.86667	4.83333	75	69.3333	73	2.066	1.873	1.946	5.46667	4.4	6.06667	6.23333	4.76667	6.56667	172.083	159.617	358.667	43.6667	37.6667	56.6667	169	161.667	167
82	57.2	51.2667	61.8667	4.66667	5.66667	4.66667	7.4	6.26667	6.96667	3.9	2.8	3.96667	81	77	82.3333	2.66833	1.91	2.13933	6.36667	6.1	6.26667	7.13333	6.8	7.1	596.467	402.633	536.483	88.3333	62.3333	80.3333	176	171.333	178
83	50.6667	41.4333	57.3667	3.66667	4.33333	3.66667	10.5667	8.26667	9	6.66667	4.53333	5.16667	79.3333	69	76	1.885	1.30133	1.87067	7.1	6.43333	7.06667	7.43333	6.7	7.46667	272.1	260.033	317.967	41.3333	35.6667	43.6667	175	168.333	173.667
84	63.4667	56.6667	65.4333	3.66667	5	4	11.2	8.06667	9.8	6.7	4.33333	6.03333	79.3333	75	82.3333	2.15633	1.97233	2.105	6.33333	6.1	6.93333	6.93333	6.53333	7.4	456.9	387.5	505.267	68.6667	61.3333	70.6667	168.667	163.333	173.667
85	63.4667	56.6667	65.4333	3.66667	4.33333	4	10.5	8	9.1	6.56667	4.3	5.33333	81.3333	78.6667	81.3333	2.20367	2.08267	2.27367	8.4	7	8	9.1	7.6	8.6	603.667	411.35	570.517	69	56.3333	68.6667	174.667	170	175.333
86	63.4667	56.6667	65.4333	3	4.33333	4	11.5333	9.03333	9.86667	7.23333	5.2	6.1	77.6667	65	75	1.921	1.71033	1.875	6.86667	6.33333	7.2	7.23333	6.66667	7.63333	357.05	300.75	480.967	50.6667	46.3333	65	169	164.333	168.333
87	58.8667	62.7667	68.6	5.33333	4.33333	4.33333	9.53333	7.83333	8.7	5.16667	4.13333	4.86667	87.3333	76.6667	83.3333	2.22233	1.97433	2.05867	7.63333	6.86667	7.26667	8.36667	7.26667	7.86667	462.267	388.333	414.483	58	55	55	176.333	170	174.333
88	56.4667	62.8333	68.7333	4.66667	4	3.33333	9.83333	8.86667	9.36667	5.33333	5.03333	5.7	83.6667	80.6667	83.6667	2.86467	2.336	3.07667	7.33333	6.36667	7.43333	7.73333	6.9	7.9	720.083	485.1	703.7	95.3333	73	92	176	170.333	175.333
89	55.6667	44.2	61.4333	3.33333	5	3	9.96667	8.26667	9.66667	5.83333	4.53333	5.83333	80.3333	76.3333	81	2.43133	2.175	2.51933	6.3	5.46667	5.83333	7	6	6.8	428.517	384.167	501.033	64.3333	66.6667	79.3333	171	167.333	170.333
90	72.3333	57.5333	68.6667	2.33333	4.33333	4	10.7667	8.46667	8.9	6.83333	4.73333	5.1	81	75	77.6667	2.58533	2.297	2.66233	7.26667	6.43333	7.26667	8.23333	7.53333	7.7	548.25	372.633	481.567	70.6667	53.3333	64.3333	170.333	162.667	169
91	52.8	59.8667	65.0667	4.66667	4	3.66667	11.0333	8.5	9.73333	7.06667	4.7	6.26667	76.3333	66.6667	74	1.85167	1.825	1.99533	7.03333	6.5	7.03333	7.4	6.93333	7.43333	238.8	293.717	351.333	33.3333	43.6667	48.6667	167.667	161.667	166
92(r)	46.5333	49.8333	59.0667	5.66667	3	4	8.6	7.33333	8.53333	4.4	3.56667	4.76667	70	63.6667	72	1.371	1.39	1.33	6.83333	6.26667	7.23333	6.03333	5.1	6.46667	231.433	234.717	383.1	39.3333	47.3333	61	162.333	158.667	164.333
93	47.4	60.9	63.3333	5.66667	4	4.66667	7.7	6.93333	8.4	3.96667	3.23333	4.8	73.3333	66.6667	78.6667	1.437	1.315	1.34367	6.83333	6.26667	7.23333	6.4	5.9	6.86667	388.733	310.617	486.2	58.6667	51	68.6667	164.333	159.667	169.667
94	67.8333	52.7667	71.2333	4.66667	2.66667	4	11.1	8.26667	9.5	7.03333	4.46667	5.63333	78.6667	66.6667	80.3333	1.56267	1.34567	1.45667	5.16667	4.53333	5.66667	5.46667	4.83333	5.96667	483.583	327.583	531.5	91	70	91.3333	171.667	160.333	173
95	56.4333	60.5667	66.6333	4.33333	3.33333	3.33333	10.9333	8.86667	9.4	6.86667	5.1	6.26667	78.3333	69	80.3333	1.89633	1.769	2.07933	6.43333	5.73333	6.6	6.9	6.1	7.03333	458.1	348.55	494.767	68.6667	59	72.3333	176.667	163.667	178.667
96	65.8667	54.3333	70.8667	3.66667	5	3	10.4667	7.63333	9.06667	6.6	3.9	5.33333	76.3333	66.3333	78.6667	1.707	1.64667	1.64867	6.63333	5.83333	7.2	6.96667	6.3	7.63333	424.067	298.983	451.1	62.3333	49.3333	60.6667	173	159	176.667
97	55.5	47.3667	58.9333	4	4.66667	3.33333	10.1333	7.63333	8.43333	6.3	4.56667	4.73333	77.6667	74.6667	82.6667	2.165	1.91267	2.085	5.4	5.06667	5.86667	6.03333	5.5	6.36667	336.683	250.533	332.8	59	47.3333	54.3333	167.333	161	171.333
98	52.4667	59.0333	66.9	4.66667	5.33333	4.33333	10.3667	7	7.7	6.43333	3.2	3.93333	79.3333	73.3333	77	3.864	2.86167	2.943	6.86667	5.66667	6.4	7.46667	6.43333	7	476.367	365.783	507.4	66.3333	60.3333	75.6667	178	162.333	178.333
99	58.5	55.6667	62	3.66667	2.66667	4	8	6.9	8.066	6.233	5.166	6.6	68.3333	66.3333	73.3333	2.935	1.97867	2.28833	7.03333	6.53333	7.3	7.46667	6.86667	7.66666	507.633	401.633	543.483	70	60	72.6667	169.333	161.667	167
100	65.6667	52.8	62.3667	3.66667	5	3.33333	11	8.8	9.16667	6.96667	5	5.4	79	76.6667	78.6667	2.94567	2.56833	2.57167	7.73333	6.56667	7.5	8.3	7.23333	7.93333	605.8	485.8	649.55	75.6667	70.3333	84	168	161.333	169.333
106	57	64.4333	60.1667	4.66667	3	4.66667	7.66667	6.63333	8.56667	4	3.03333	4.9	77	71.3333	79.6667	2.94567	2.94567	2.57167	6.8	5.73333	6.9	7.33333	6.13333	7.26667	331.817	200.4	304.2	47	33.6667	42.6667	166.333	161.667	169
107(b)	55.3333	65.2	62.2	5	3.66667	4	9.86667	7.2	8.56667	5.96667	3.36667	4.86667	78	72.3333	80.3333	4.22433	4.184	4.15567	9.067	8.1	9.3	8.4	7.667	8.167	911.3	730.28	989.6	104.33	92.667	113.33	166.333	165.667	179.333
108	59	49.9667	66.2667	3	4.66667	4	10.2	8.43333	9.16667	6.3	4.66667	5.4	69.3333	64.3333	73	1.828	1.71067	2.011	6.86667	6.46667	7.33333	7.2	6.76667	7.76667	469.333	343.567	508.517	66.6667	52	67.3333	160.333	158	164.667
109	62.3333	67	66.6667	3.66667	4	3.33333	10.1667	7.13333	9.8	6.3	3.3	6.03333	75.3333	71.3333	77.3333	2.32167	2.094	2.274	7.53333	7.1	8.03333	8.13333	7.56667	8.63333	680.917	488.6	699.4	87	66.6667	84	164.667	160.333	167.667
110	58.6667	59.1667	67.7333	5	4.33333	4	9.93333	6.43333	8.16667	6.06667	2.9	4.4	65	63.3333	70.6667	1.79667	1.48333	1.63533	7.56667	6.73333	7.4	6.96667	6.16667	6.8	593.067	424.1	601.667	81.6667	65.6667	84.6667	160.333	157.667	167.333
111	59.3333	60.5667	61.3	5.33333	4	5	8.46667	8.6	9.73333	4.66667	4.83333	6	79.3333	75.3333	82.3333	3.48633	2.89867	2.99	5.76667	5.13333	6.23333	6.63333	5.86667	7.06667	547.6	335.583	649.15	88.3333	61	97.6667	171	167.667	175
112	64.3333	59.2333	68.9	3.66667	3	3	11.3333	9.76667	10.7	7.06667	6	6.66667	86	77.6667	82.6667	3.30233	3.501	2.94033	7.76667	7	8.33333	7.03333	6.43333	7.73333	458.967	418.317	557.5	61.6667	62.3333	69.3333	175.667	168.333	172.333
113	71.6667	62.1	62.7333	4	3.66667	4	9.96667	7.83333	8.56667	5.83333	4	4.7	76.3333	69.6667	80.3333	2.03667	2.009	2.534	8.86667	7.8	9.33333	7.5	6.5	7.66667	387.733	296.217	539.267	47.3333	41.6667	63.3333	166.667	160.333	169.333
126	61.6667	54.5	60	3.66667	4.66667	4	9.63333	8.83333	8.13333	5.83333	5.06667	4.3	85	77	85.3333	2.66767	2.00567	2.30467	6.5	5.4	6.56667	7.16667	6.03333	7.26667	599.783	356.45	573.483	87.6667	62.3333	83	174.333	165.667	174
116	62	59.5	65.6667	4.66667	5	4.33333	13.2333	9.8	8.73333	7.86667	6.06667	4.93333	85	75.6667	84.3333	2.30367	2.03633	2.24467	6.33333	6.26667	6.8	6.76667	6.66667	7.26667	465.383	379.367	511.8	71	58.6667	72.6667	172.333	165	173
127	66.6667	59.2	66.0667	4.66667	5.66667	4.66667	9.5	6.83333	7.2	5.63333	3.06667	3.63333	79.3333	76.3333	80.6667	2.65667	2.10567	2.639	6.93333	6.3	7.43333	8.06667	7.1	8.06667	653.833	404.1	680.233	87.3333	60.3333	87.6667	167.667	162.333	171.333
119	72.6667	51.8	65.2333	4.33333	3.33333	3.66667	11.6333	8.16667	9.16667	7.26667	4.36667	5.3	76.3333	67.6667	74.3333	1.795	1.61	1.90867	7.83333	7.06667	8.06667	8.4	7.63333	8.56667	402.183	357.583	398.617	49.6667	48.6667	47.6667	167.333	159.667	164.667
121	70.4667	60.8	63.7667	3.66667	4.66667	4	10.6667	9.06667	9.53333	6.7	5.33333	5.76667	79.3333	68.3333	75.3333	1.69933	1.40167	1.38333	6.83333	6.43333	6.86667	7.26667	6.8	7.23333	564.867	394.45	605.667	80	59.6667	85.6667	170.333	161.333	164.333
120	63	58.7667	68.9	5.33333	6	5	10.8	8.23333	8.86667	6.86667	4.43333	5.13333	85	70.3333	75	2.05733	2.02733	2.274	7.03333	6.26667	7.66667	7.66667	7.06667	8.1	605	491.1	676.117	82.3333	73.6667	85.6667	173.333	166.333	167.333
122	70.1667	65.8333	72.8333	4	3.33333	4.33333	10.3667	9.86667	8.93333	6.46667	6	5.03333	79	69.3333	74.3333	1.47267	1.32833	1.385	7.1	6.93333	7.13333	7.53333	7.33333	7.56667	418.9	343.4	398.183	58.6667	47	54	168.333	160.667	165.333
123	69.7667	68.4667	75.4667	5.33333	5	5.33333	10.7667	8.93333	9.56667	6.5	5.13333	5.76667	88.3333	77.6667	85.6667	2.40467	2.10033	2.31633	6.93333	6.26667	7	7.8	7.06667	7.56667	637.017	350.5	531.633	86.3333	52.6667	73	176.667	168.667	174.667
125	57.2	56.6667	62.5667	3.33333	4	3.66667	10.4	7.63333	8.2	6.43333	3.86667	5.33333	80.6667	68.6667	79.3333	1.77067	1.757	1.99867	7.2	6.73333	7.5	7.76667	7.16667	7.93333	337.05	326.15	445.5	50.333	47	57.6667	172.333	159.333	170.333
129	67.6667	69.6667	68.5667	5	5.33333	4.33333	10.5667	9.16667	9.1	6.63333	5.36667	5.26667	95	78.6667	90	2.66933	2.42533	2.47167	9.23333	8.3	8.96667	8.36667	6.96667	8.06667	936.233	653.733	908.833	106.333	85.3333	106.667	184	171.333	180.333
130	72	69.6333	75.1	5	5.66667	4.33333	9.93333	8.43333	8.96667	6.1	4.66667	5.16667	76	67.3333	78.3333	1.97	2.03733	2.07467	8.33333	8.03333	8.43333	6.76667	6.86667	7.26667	649.15	603.8	772.417	86	81	98.3333	171.667	165	175
131	66.8333	61.1333	69.5667	4.33333	5.66667	5	9	7.66667	9.13333	5.23333	3.96667	5.3	99.3333	82.3333	91.6667	2.89233	2.276	2.43633	8.93333	8.03333	8.46667	7.5	6.5	7.2	859.567	651.417	810.8	104.667	89.6667	103.667	188.333	171.667	180.667
